# Supplementary material for: Synthesis of porous MnCo2O4 microspheres with yolk–shell structure induced by concentration gradient and the effect on their performance in electrochemical energy storage
Source: Royal Society of Chemistry journal article supplement (doi:10.1039/c5ra24098k), 2016-01-01
Supplement: c5ra24098k1.pdf [file c5ra24098k1.pdf]

## Supporting Information

### Synthesis of Porous $\text{MnCo}_2\text{O}_4$ Microspheres with Yolk-Shell Structure Induced by Concentration Gradient and the Effect on their Performance in Electrochemical Energy Storage

Guoyong Huang <sup>a,b</sup>, Shengming Xu <sup>b,c,\*</sup>, Yue Yang, <sup>b,\*</sup> Hongyu Sun <sup>d,\*</sup>, Zhenghe Xu <sup>b,e</sup>

<sup>a</sup> School of Metallurgy and Environment, Central South University, Changsha 410083, China

<sup>b</sup> Institute of Nuclear and New Energy Technology, Tsinghua University, Beijing 100084, China

<sup>c</sup> Beijing Key Lab of Fine Ceramics, Tsinghua University, Beijing 100084, China

<sup>d</sup> Beijing National Center for Electron Microscopy, School of Materials Science and Engineering, Tsinghua University, Beijing 100084, China

<sup>e</sup> Department of Chemical and Materials Engineering, University of Alberta, Edmonton, Alberta T6G 2V4, Canada

\*E-mail: [smxu@tsinghua.edu.cn](mailto:smxu@tsinghua.edu.cn); [eric1911@126.com](mailto:eric1911@126.com); [hysuny@mail.tsinghua.edu.cn](mailto:hysuny@mail.tsinghua.edu.cn).

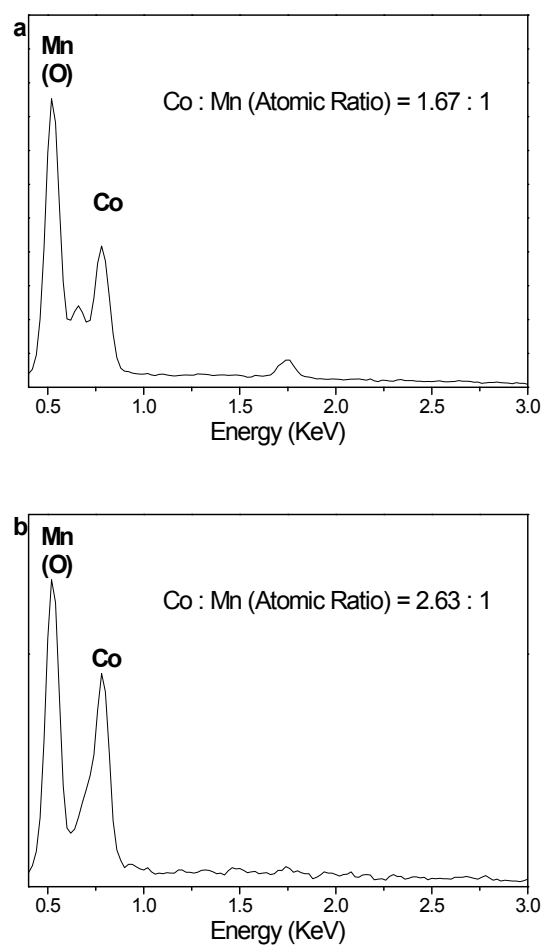

**Fig. S1.** Representative EDX spectra in Fig. 4a. (a) Core and (b) Shell.

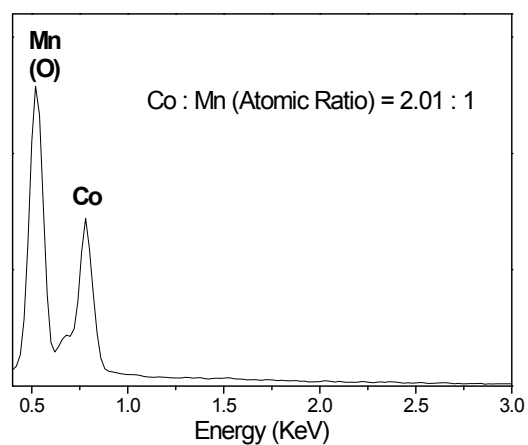

Fig. S2. Representative EDX spectrum in Fig. 5a.

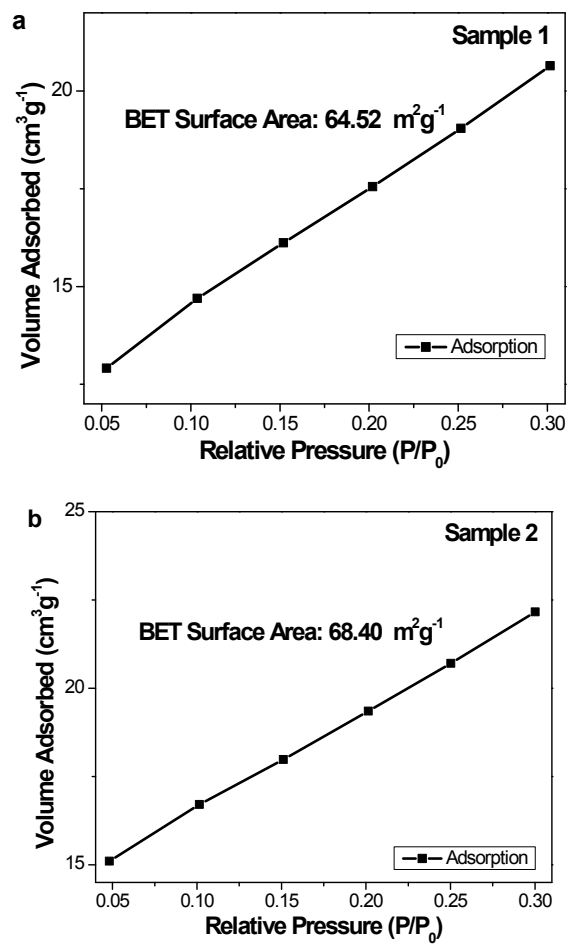

Fig. S3.  $N_2$  adsorption isotherms of  $\text{MnCo}_2\text{O}_4$  samples.

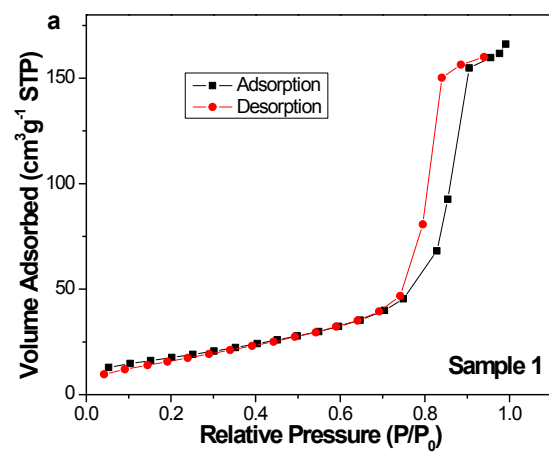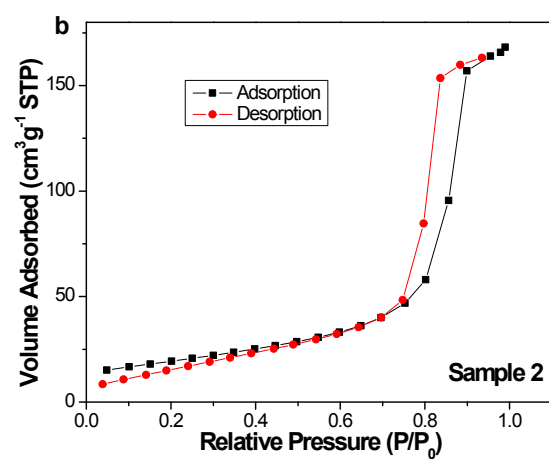

**Fig. S4.** N<sub>2</sub> adsorption/desorption isotherms of MnCo<sub>2</sub>O<sub>4</sub> samples.

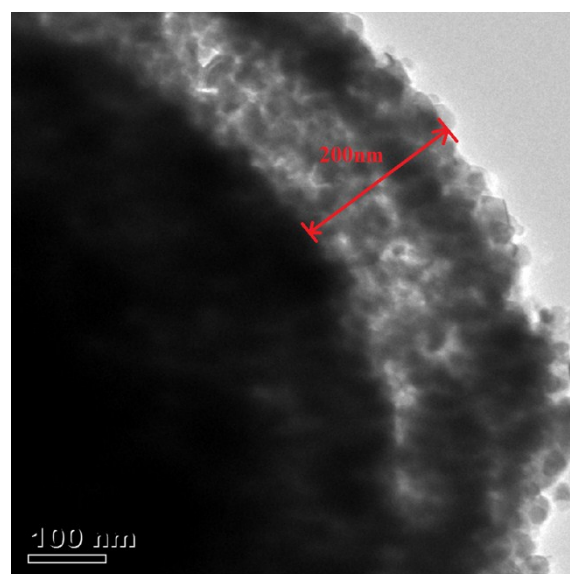

**Fig. S5.** TEM image of partial enlarged detail of Sample 1 microsphere.

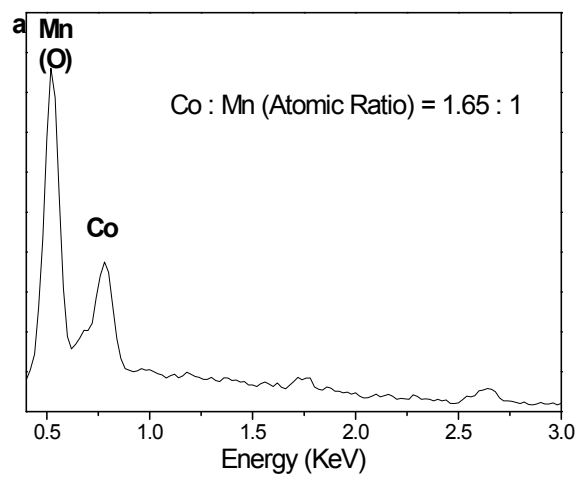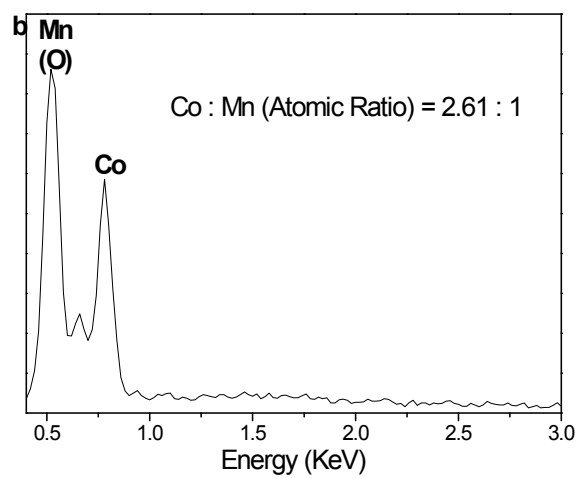

Fig. S6. Representative EDX spectra in Fig. 11a. (a) Core and (b) Shell.

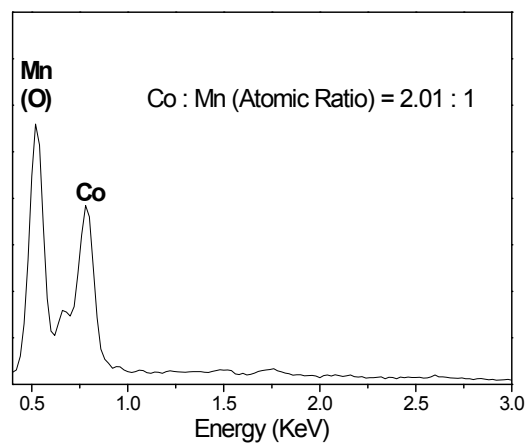

Fig. S7. Representative EDX spectrum in Fig. 12a.

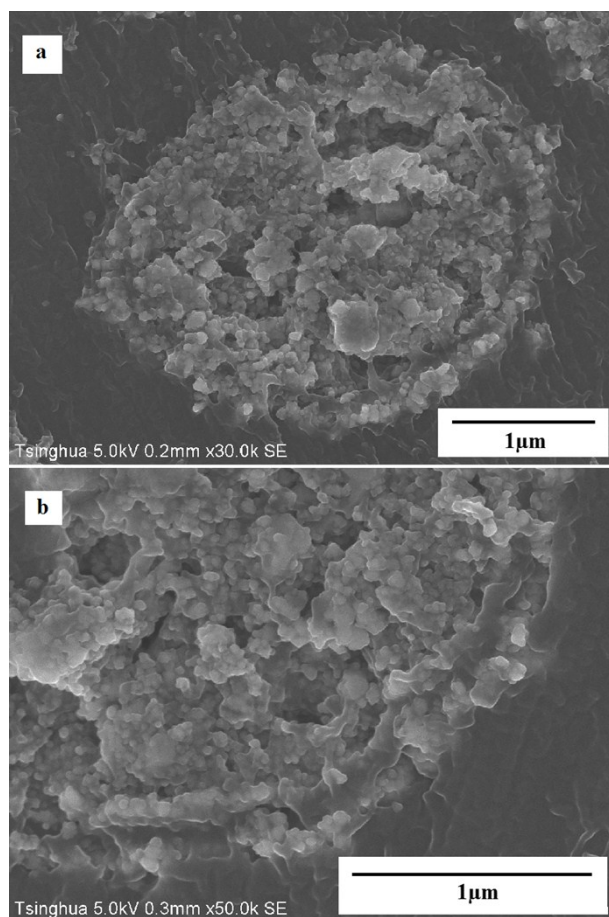

**Fig. S8.** SEM images of the cross section of Sample 1 (mixtures of MnCo<sub>2</sub>O<sub>4</sub>/ATB/PVDF) after 40 cycles at 0.2 Ag<sup>-1</sup>.

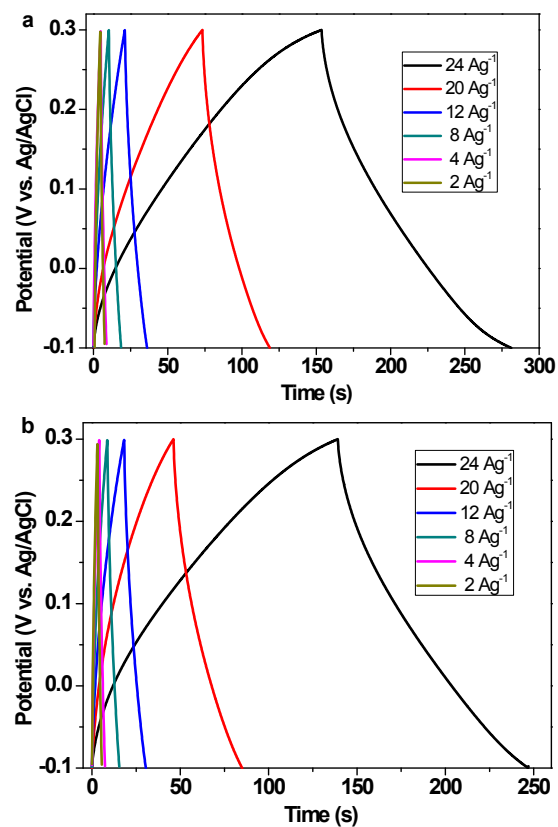

**Fig. S9.** Galvanostatic charge-discharge curves of MnCo<sub>2</sub>O<sub>4</sub> electrodes at various current densities. (a) Sample 1 and (b) Sample 2.

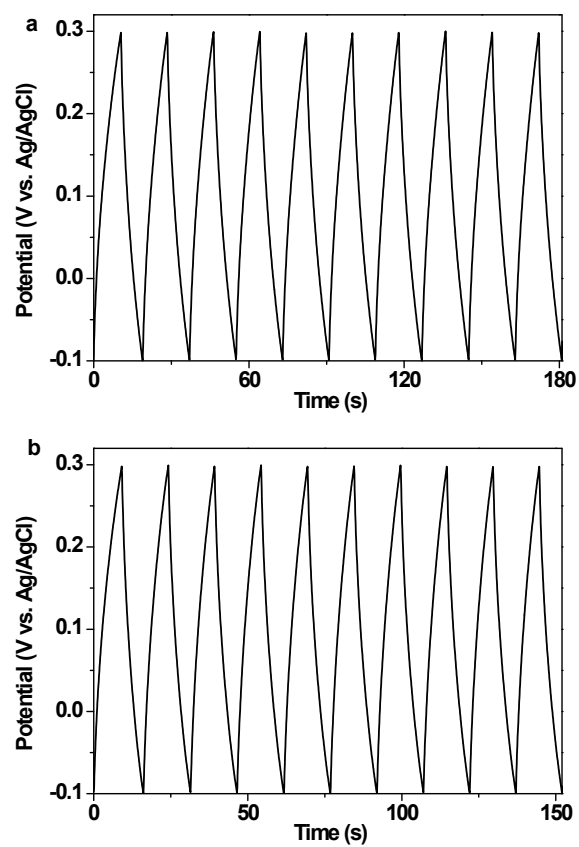

**Fig. S10.** First ten galvanostatic charge-discharge curves of  $\text{MnCo}_2\text{O}_4$  electrodes in the range of -0.10~0.30 V at  $12 \text{ Ag}^{-1}$ . (a) Sample 1 and (b) Sample 2.
